# Supplementary material for: HIF-1α/microRNA-128-3p axis protects hippocampal neurons from apoptosis via the Axin1-mediated Wnt/β-catenin signaling pathway in Parkinson’s disease models
Source: publisher site journal article supplement (doi:10.18632/aging.102636), 2020-03-12
Supplement: Supplementary file [file aging-v12i5-102636-supplementary-material-SD1.pdf]

SUPPLEMENTARY FIGURE

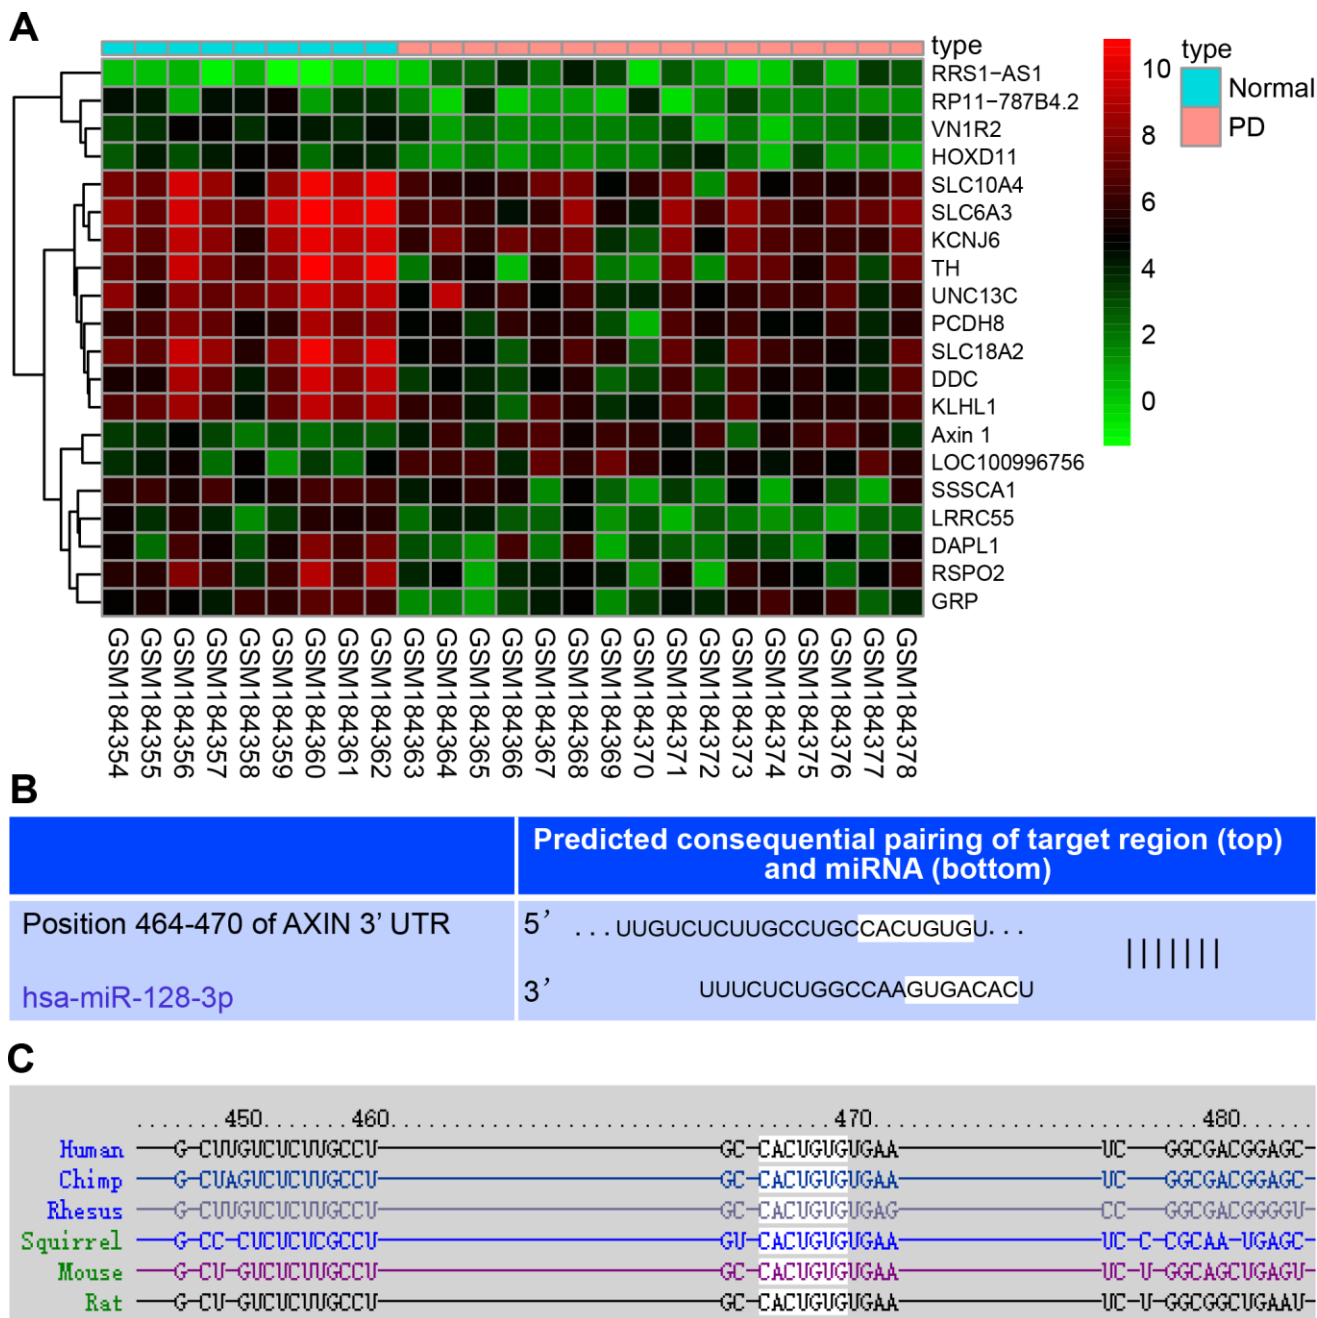

**Supplementary Figure 1. The therapeutic significance of the HIF-1 $\alpha$ /miR-128-3p/AXIN1 axis in hippocampal neurons via the Wnt/ $\beta$ -catenin signaling pathway.** (A) The heatmap of DEGs that were screened from the PD-related microarray dataset GSE7621; the abscissa represents the sample number, and the ordinate represents the DEGs; the clustering of gene expression level is presented using a dendrogram in the upper left region, each rectangle indicates the expression of one gene in one sample, and the color gradation is presented using a histogram in the upper right region. (B) The predicted binding sites between miR-128-3p and *Axin1* 3'UTR using Targetscan. (C) The sequence homology between human and mouse miR-128-3p and *Axin1* 3'UTR.
